# Supplementary material for: Signatures of Crested Ibis MHC Revealed by Recombination Screening and Short-Reads Assembly Strategy
Source: PLoS One. 2016 Dec 20;11(12):e0168744. doi: 10.1371/journal.pone.0168744 (PMC5173252; doi:10.1371/journal.pone.0168744)
Supplement: S2 Table — All forward oligos are phosphorylated at the 5’ end. (XLSX) [file pone.0168744.s007.xlsx]

## Sheet: Sheet1
recom-primer	Sequence
a1-F	5'-CCAATGGTGACTGGACCTACCAGACGCAGGTGACCCTGCTGGTGGCCCCGAACTCACGTTAAGGGATTTTGGTCA-3'
a1-R	5'-TGGTCCAGGCTGGCGTGTTGCACCGAGCACGTGAAGGTGTCCCCGGCCACTAATGGTTTCTTAGACGTCAGGTGG-3'
a2-F	5'-CAGACAATTCCGAGGAGCGCCATAGTTGTGGAAAAGCACCTCAGGATCTCAACTCACGTTAAGGGATTTTGGTCA-3'
a2-R	5'-ATCTCTTCTCAAGCAACCGCCACCAGCCACCAAATATTTGGGGGCTTTCCTAATGGTTTCTTAGACGTCAGGTGG-3'
a3-F	5'-ATGGGGACACAGCAGGGGGGGCGTGGGGACACAGGGAATGGCCTTGGGGAAACTCACGTTAAGGGATTTTGGTCA-3'
a3-R	5'-TAGAGGTGAGCCCAAGGGGACACCGTGTCCCCAGAGTCCTCCCTGCCGTGTAATGGTTTCTTAGACGTCAGGTGG-3'
c1-F	5'-CACAGGTGGTACCCAGAGATACCCTCACCTGTGAGGGCATCAGTGGAGATAACTCACGTTAAGGGATTTTGGTCA-3'
c1-R	5'-GCTACAAGTTCAACCTGTACGGGGTGTGGGGTCGGAAACGGATTGGTCTTTAATGGTTTCTTAGACGTCAGGTGG-3'
c2-F	5'-AAAAGCCTACTTTGAGTCAGCGCACGCATTAGCCCGCTTTCCATCCGATAAACTCACGTTAAGGGATTTTGGTCA-3'
c2-R	5'-CAGGGACGCTGCTGTAACCTTGGGAAAGGAAAGAGAAGTAAGGCTGGAATTAATGGTTTCTTAGACGTCAGGTGG-3'
c3-F	5'-GCCCGGGGCTTCCCCAGTTCGTAATCTTGGGGTACTTGGATGGGAACCCCAACTCACGTTAAGGGATTTTGGTCA-3'
c3-R	5'-CAGGCTGCCTGGGGCTCCACCTTCCCCGTCTCGCTGTCGTAGCGCATAAATAATGGTTTCTTAGACGTCAGGTGG-3'
e0-F	5'-TCCCGACCTCCTCCCCCGTCCTCAATCCACGTGCGTCTTCATGTGGGAGAAACTCACGTTAAGGGATTTTGGTCA-3'
e0-R	5'-CTACCGCTGCTCCGACTGCGGGAACTGCTACAGGACCAAGGTCTCCTTGATAATGGTTTCTTAGACGTCAGGTGG-3'
e1-F	5'-AGCCCCAATAAAACCAGAAGCGCGGGAGCAGCCCGGATATTTTATTCTTTAACTCACGTTAAGGGATTTTGGTCA-3'
e1-R	5'-ATAATCGCATCCATGTCTGGCAAATGCCCTTTCCTGGGGTGTAAAATGGGTAATGGTTTCTTAGACGTCAGGTGG-3'
e2-F	5'-CACGAGTCTGTTGCCACTGCTGTGCACCTTTTCTTTTTGATTTTTTTGGTAACTCACGTTAAGGGATTTTGGTCA-3'
e2-R	5'-TCCCCAAGAAGGGGAAAGGTGCTGTACATGAAGAAGAAAAGCTGTTTCTATAATGGTTTCTTAGACGTCAGGTGG-3'
e3-F	5'-AGCTCGAGGTCAAAGGGAAACCTAAGGATCTTCGAGTCCAGCTCCCAAAGAACTCACGTTAAGGGATTTTGGTCA-3'
e3-R	5'-TTTCCAAAGCCCCGCGTCCCTTGCCGGGATTCTCCAAAACTCTGCTTAAATAATGGTTTCTTAGACGTCAGGTGG-3'
e4-F	5'-CTTTTTTCCTTCCTCTGCTGCTTTGCTGTGGCGATTCATGCTCTTTGTC TAACTCACGTTAAGGGATTTTGGTCA-3'
e4-R	5'-AAACCTTTTGCTGTTCTTTCCGTAAGCTAGAAACCACAACTGGAGTCAGCTAATGGTTTCTTAGACGTCAGGTGG-3'
e5-F	5'-ACAACAAAAACTTGCTTTTCTGTGTAGCTCAGCAGGCCCAGAAAAAGCTCAACTCACGTTAAGGGATTTTGGTCA-3'
e5-R	5'-GGTGCCTTCGAGTGAAAAGAGGCTGATTTTTTTTCTTCTGCAACACTAGATAATGGTTTCTTAGACGTCAGGTGG-3'
e7-F	5'-ACGTTTTATATTGCTAGAGGAATATTAGAGGAATGAGCATTTTCCCTCCGAACTCACGTTAAGGGATTTTGGTCA-3'
e7-R	5'-ACAGTGGAGACCTTTTGATTCTCTCCATCATTGAAAACATCTACACCTTCTAATGGTTTCTTAGACGTCAGGTGG-3'
e18-F	5'-ATCGCGCCTCCGTGAGAAACCACCTCCGTGGACTTGGTTTTAGGTCCGCTAACTCACGTTAAGGGATTTTGGTCA-3'
e18-R	5'-ATCATTAGGACAGGGCTGGGAGACCTGGATTCCCCATCAAAAGCGGTGGGTAATGGTTTCTTAGACGTCAGGTGG-3'
e26-F	5'-CATGTGCGTTTTGTCTGTGTGCACATGCCTCACTTGGCTCTTTCTCCTAAAACTCACGTTAAGGGATTTTGGTCA-3'
e26-R	5'-CAGCCCCTTAAATAGCACCCCCGAATGAAGTCACACCTTGCTTGTTTTAATAATGGTTTCTTAGACGTCAGGTGG-3'
e31-F	5'-TGCTTTTGTGGGCAGTGACGTTGTCTTTCTTCTCGAACTTCTTGCCGCAGAACTCACGTTAAGGGATTTTGGTCA-3'
e31-R	5'-CACATGAAGAAACACGACGCCGACTCCTTCTACCAGTTCTCCTGCGACATTAATGGTTTCTTAGACGTCAGGTGG-3'
16-F	5'-TGTGTATGAGTGTCAGTTCCTCAACGGCACCGAGCGGGTGAGGTTTGTGGAACTCACGTTAAGGGATTTTGGTCA-3'
16-R	5'-CACATCGCTGTCGAAGTGCATGAACTGCTCCCGGTTGTGGATGCGCCTCTTAATGGTTTCTTAGACGTCAGGTGG-3'
